# Supplementary material
Source: ML conference proceedings conference paper supplement (https://openreview.net/forum?id=Thv66GmqZS)

# Memory Usage In Multi-lora Serving

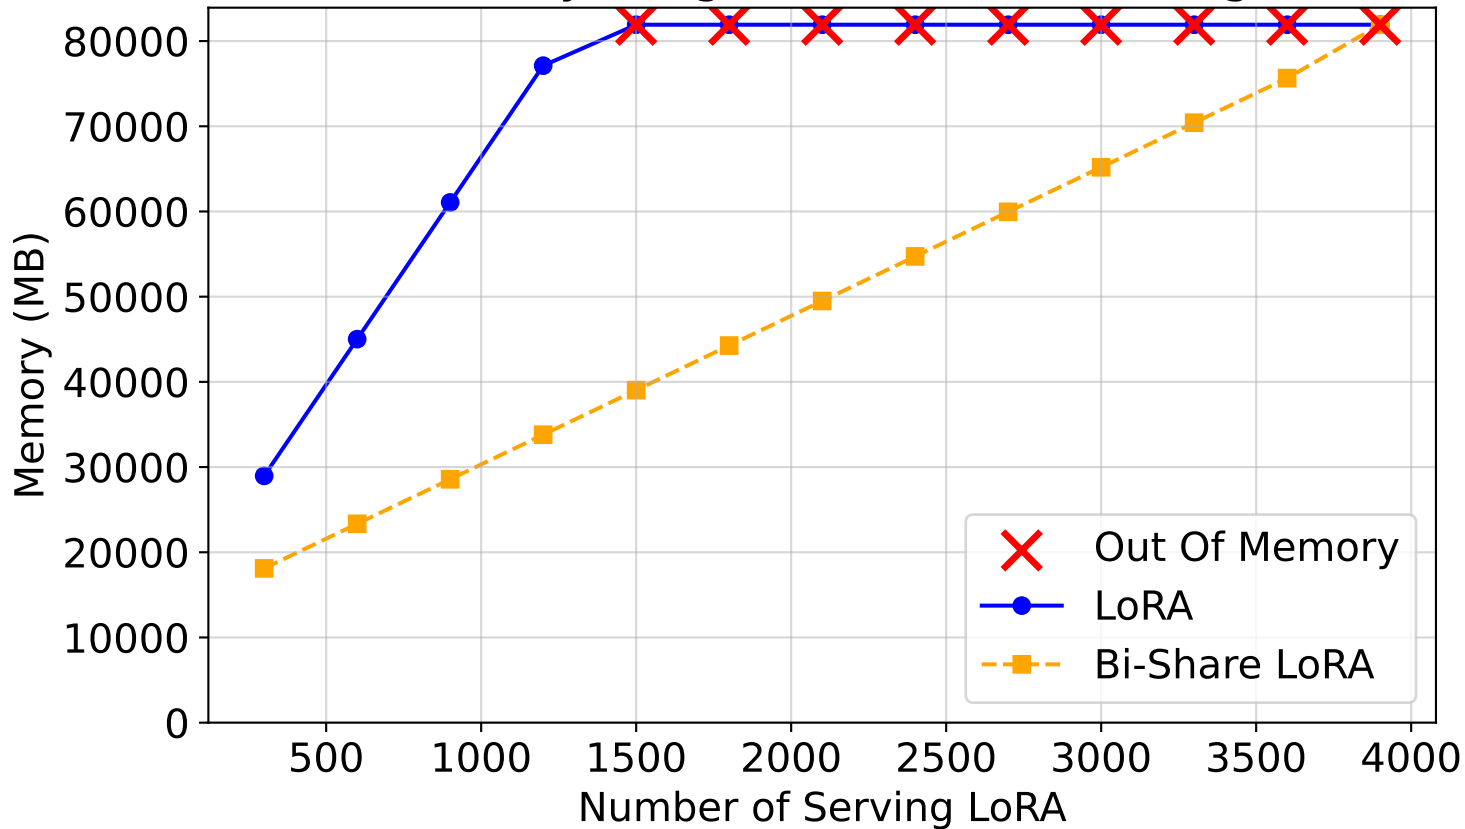

Supplement: supplementary_material [file attachment]
